# Supplementary material for: Patient, carer and healthcare professional experiences of complex care quality in multidisciplinary primary healthcare centres: qualitative study with face-to-face, in-depth interviews and focus groups in five French multidisciplinary primary healthcare centres
Source: HighWire-hosted journal article supplement (doi:10.1136/bmjopen-2021-050165), 2021-12-01
Supplement: bmjopen-2021-050165supp001_data_supplement.pdf [file bmjopen-2021-050165supp001_data_supplement.pdf]

## Patient/carer interview guide

|                      |                                                                                                                                                                                                                                                                                                                                                                                                                                                                                                                            |
|----------------------|----------------------------------------------------------------------------------------------------------------------------------------------------------------------------------------------------------------------------------------------------------------------------------------------------------------------------------------------------------------------------------------------------------------------------------------------------------------------------------------------------------------------------|
| 1 Main question      | -Can you describe the type of medical care you receive?                                                                                                                                                                                                                                                                                                                                                                                                                                                                    |
| Stimulus question(s) | -Which professionals provide your care?<br>-Are there any treatments that you perform yourself?<br>-Are there any treatments that are carried out by a relative?                                                                                                                                                                                                                                                                                                                                                           |
| 2 Main question      | -When did this type of regular follow-up begin in this health centre?<br>-Who did you consult first?                                                                                                                                                                                                                                                                                                                                                                                                                       |
| Stimulus question(s) | -Have any changes or adjustments occurred during this regular follow-up?                                                                                                                                                                                                                                                                                                                                                                                                                                                   |
| 3 Main question      | -During the week, when and how often do these appointments take place?                                                                                                                                                                                                                                                                                                                                                                                                                                                     |
| Stimulus question(s) | -Do you have home visits?                                                                                                                                                                                                                                                                                                                                                                                                                                                                                                  |
| 4 Main question      | - Could you describe your daily medical care procedures? With which appointment do you start? How long does it last? Then what?                                                                                                                                                                                                                                                                                                                                                                                            |
| Stimulus question(s) | - Would you say that these appointments complement each other?                                                                                                                                                                                                                                                                                                                                                                                                                                                             |
| 5 Main question      | -Do you receive any financial assistance or other help (such home help, day care, etc.) for these treatments?                                                                                                                                                                                                                                                                                                                                                                                                              |
| 6 Main question      | -What do you think about the organisation of care?                                                                                                                                                                                                                                                                                                                                                                                                                                                                         |
| Stimulus question(s) | -Do you notice coordination between health care professionals?<br>-Do you feel that information is passed on between the health care professionals? Which ones?<br>-Do you feel you understand the purpose of your treatments?                                                                                                                                                                                                                                                                                             |
| 7 Main question      | -Do you feel that this organisation has made a difference in the way you deal with your health problems?                                                                                                                                                                                                                                                                                                                                                                                                                   |
| Stimulus question(s) | -Do you feel that you understand your health problems?<br>-Do you feel like you are investing in your care?<br>-Do you feel you make decisions with the health care professionals?<br>-Do you have any further comments about this provision of care?<br><br>Specifically for the carer:<br>-Do you think you have sufficient knowledge of the procedures you have to perform for your loved one's condition (whether they be daily or from time to time)?<br>-Do you feel fully able to help your loved one? How exactly? |
| 8 Main question      | -How is your role defined? (talking to the carer)<br>-Do you think your role has been better defined since the patient has been treated in the MPHCC?                                                                                                                                                                                                                                                                                                                                                                      |
| 9 Main question      | -What does quality of care mean to you (both)?                                                                                                                                                                                                                                                                                                                                                                                                                                                                             |
| Stimulus question(s) | -Do you think you play a role in this quality or is it independent of you? If yes, why?<br>-Do you trust the different professionals?<br>-Has this trust increased?<br>-Do you speak more to certain professionals?                                                                                                                                                                                                                                                                                                        |

|                      |                                                                                                                                                                                                                                          |
|----------------------|------------------------------------------------------------------------------------------------------------------------------------------------------------------------------------------------------------------------------------------|
| 10 Main question     | -Have you ever discussed your treatments or regular follow-up sessions with any of the health care professionals?                                                                                                                        |
| Stimulus question(s) | -During treatment sessions or consultations, do you ask questions about the treatment methods for your condition?<br><br>- Would you say that the way you are cared for here facilitates discussions with the health care professionals? |
| 11 Main question     | -Do you sometimes contact the health care professionals involved in your care outside of your consultations (by phone, email, etc.)? If so, why?                                                                                         |
| Stimulus question(s) | -Do you go via the assistant?                                                                                                                                                                                                            |
| 12 Main question     | -Do you find that the various consultations or regular follow-up sessions have changed the way you or your loved ones deal with your illness / condition?                                                                                |
| Stimulus question(s) | -Have these treatments been the subject of discussions between you?                                                                                                                                                                      |
| 13 Main question     | - Can you think about your care experiences which did not occur at home or in this health centre setting? What difference(s) do you see?                                                                                                 |
| 14 Main question     | -Has this provision of care affected your care pathway in ways that we have not mentioned?                                                                                                                                               |
| Stimulus question(s) | -Has this way of working with the health care professionals enabled you to anticipate any flare ups/attacks or any health problems?                                                                                                      |
| 15 Main question     | -Are there ways the group could function better which would help you more?                                                                                                                                                               |
